# Supplementary material for: Shorter Survival after Liver Pedicle Clamping in Patients Undergoing Liver Resection for Hepatocellular Carcinoma Revealed by a Systematic Review and Meta-Analysis
Source: MDPI journal article supplement (doi:10.3390/cancers13040637), 2021-02-05
Supplement: s1 [file s1]

## Supplementary Material

# Shorter Survival after Liver Pedicle Clamping in Patients Undergoing Liver Resection for Hepatocellular Carcinoma Revealed by a Systematic Review and Meta-Analysis

Charles-Henri Wassmer, Beat Moeckli, Thierry Berney, Christian Toso and Lorenzo A. Orci

**Table S1:** Meta-analysis comparing baseline characteristics of the study groups.

|                                       | Number of Studies | Measure of Effect        | Pooled Estimate | 95% Confidence Interval | <i>p</i> Value |
|---------------------------------------|-------------------|--------------------------|-----------------|-------------------------|----------------|
| Gender (M : F)                        | 11                | Odds ratio               | 0.99            | 0.89 to 1.11            | 0.961          |
| Underlying liver cirrhosis            | 11                | Odds ratio               | 1.89            | 0.81 to 4.38            | 0.139          |
| Alpha-feto protein (U/L)              | 5                 | Weighted mean difference | 411.59 [U/L]    | -965.31 to 1788.5       | 0.558          |
| Tumor size (cm)                       | 7                 | Weighted mean difference | 0.10 [cm]       | -0.366 to 0.568         | 0.673          |
| Multinodular hepatocellular carcinoma | 11                | Odds ratio               | 1.02            | 0.88 to 1.19            | 0.812          |
